# Supplementary material
Source: Springer Nature journal article supplement (https://www.springermedizin.de/resource/supplementary/12876_2008_287_MOESM4_ESM.pdf/9439090)

**A****pHH3**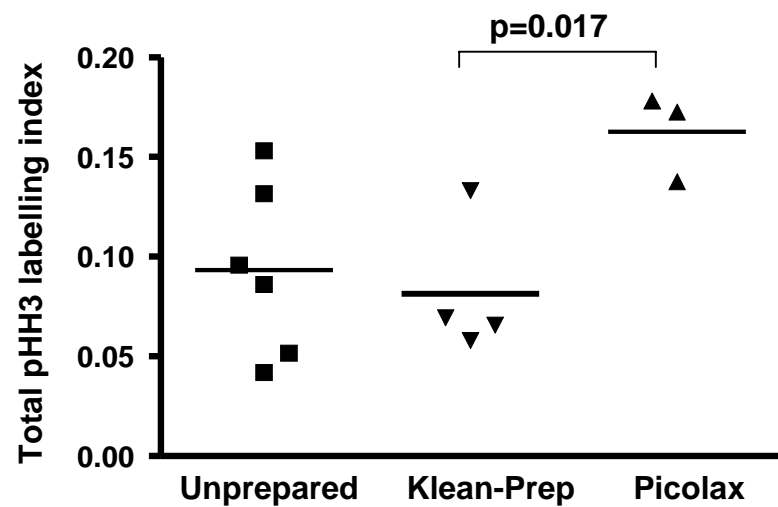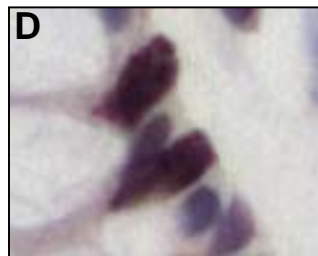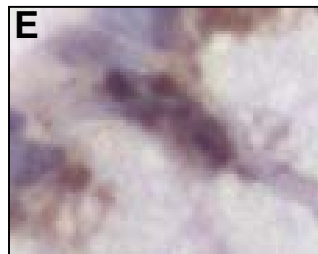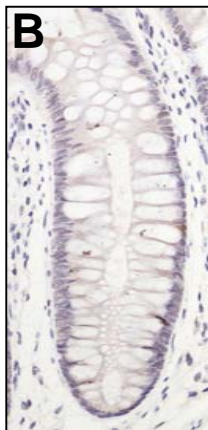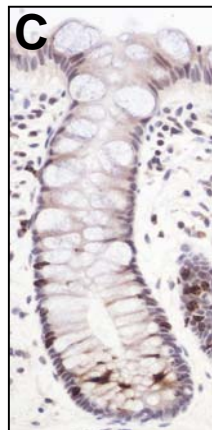

Supplement: MOESM4 [file 9439090]
